# Supplementary material
Source: Research Square preprint supplement (doi:10.21203/rs.3.rs-9924753/v1)
Supplement: Supplementary file 1 [file 607af88666f5b2f7343dc4a0.docx]

| Feature | Group | Control Mean (std) | Subgroup Mean (std) | p-value |
| --- | --- | --- | --- | --- |
| ζmin​​ (°) | MAD+ MVP+ (N = 38) | 76.81 (13.41) | 68.20 (10.79) | 0.000644 |
|  | MAD+ AP- (N = 28) | 76.81 (13.41) | 68.23 (11.27) | 0.001854 |
|  | MAD+ PP- (N = 24) | 76.81 (13.41) | 68.56 (9.60) | 0.006458 |
|  | MAD+ PP+ (N = 15) | 76.81 (13.41) | 68.27 (12.75) | 0.014291 |
| ​ζES​ −ζED​ (°) | MAD+ MVP+ (N = 38) | 42.85 (16.91) | 44.83 (12.88) | 0.748479 |
|  | MAD+ AP- (N = 28) | 42.85 (16.91) | 41.62 (14.35) | 0.59959 |
|  | MAD+ PP- (N = 24) | 42.85 (16.91) | 44.44 (14.79) | 0.718545 |
|  | MAD+ PP+ (N = 15) | 42.85 (16.91) | 42.33 (13.26) | 0.657208 |
| ζ´´min (°/ms²) | MAD+ MVP+ (N = 38) | -0.0040 (0.0021) | -0.0048 (0.0021) | 0.092136 |
|  | MAD+ AP- (N = 28) | -0.0040 (0.0021) | -0.052 (0.0021) | 0.039136 |
|  | MAD+ PP- (N = 24) | -0.0040 (0.0021) | -0.0048 (0.0021) | 0.308991 |
|  | MAD+ PP+ (N = 15) | -0.0040 (0.0021) | -0.0048 (0.0021) | 0.160241 |
| ζ´min (°/ms) | MAD+ MVP+ (N = 38) | -0.33 (0.14) | -0.37 (0.16) | 0.110382 |
|  | MAD+ AP- (N = 28) | -0.33 (0.14) | -0.37 (0.18) | 0.235466 |
|  | MAD+ PP- (N = 24) | -0.33 (0.14) | -0.39 (0.19) | 0.07299 |
|  | MAD+ PP+ (N = 15) | -0.33 (0.14) | -0.32 (0.08) | 0.937011 |
| *d*ap​ (mm) | MAD+ MVP+ (N = 38) | 5.92 (5.07) | 7.60 (4.24) | 0.101634 |
|  | MAD+ AP- (N = 28) | 5.92 (5.07) | 7.73 (4.57) | 0.123097 |
|  | MAD+ PP- (N = 24) | 5.92 (5.07) | 7.10 (3.80) | 0.259813 |
|  | MAD+ PP+ (N = 15) | 5.92 (5.07) | 8.14 (4.90) | 0.191214 |
| *d’ap* (mm/ms) | MAD+ MVP+ (N = 38) | 0.07 (0.03) | 0.09 (0.05) | 0.023115 |
|  | MAD+ AP- (N = 28) | 0.07 (0.03) | 0.09 (0.05) | 0.033263 |
|  | MAD+ PP- (N = 24) | 0.07 (0.03) | 0.09 (0.04) | 0.055939 |
|  | MAD+ PP+ (N = 15) | 0.07 (0.03) | 0.09 (0.06) | 0.221749 |
| τP​ | MAD+ MVP+ (N = 38) | 1.85 (2.04) | 1.78 (0.91) | 0.105936 |
|  | MAD+ AP- (N = 28) | 1.85 (2.04) | 1.62 (0.69) | 0.429789 |
|  | MAD+ PP- (N = 24) | 1.85 (2.04) | 1.80 (0.96) | 0.181325 |
|  | MAD+ PP+ (N = 15) | 1.85 (2.04) | 1.67 (0.85) | 0.648441 |
| τA​ | MAD+ MVP+ (N = 38) | 1.57 (1.03) | 1.46 (0.55) | 0.648638 |
|  | MAD+ AP- (N = 28) | 1.57 (1.03) | 1.77 (1.30) | 0.484796 |
|  | MAD+ PP- (N = 24) | 1.57 (1.03) | 1.77 (1.34) | 0.368797 |
|  | MAD+ PP+ (N = 15) | 1.57 (1.03) | 1.41 (0.66) | 0.195376 |
| τB​ | MAD+ MVP+ (N = 38) | 2.01 (1.18) | 1.64 (0.59) | 0.272665 |
|  | MAD+ AP- (N = 28) | 2.01 (1.18) | 1.59 (0.56) | 0.195709 |
|  | MAD+ PP- (N = 24) | 2.01 (1.18) | 1.63 (0.53) | 0.479491 |
|  | MAD+ PP+ (N = 15) | 2.01 (1.18) | 1.65 (0.68) | 0.333759 |
| P​trans (mm) | MAD+ MVP+ (N = 38) | 10.52 (4.23) | 12.51 (4.05) | 0.013614 |
|  | MAD+ AP- (N = 28) | 10.52 (4.23) | 11.48 (4.49) | 0.348055 |
|  | MAD+ PP- (N = 24) | 10.52 (4.23) | 12.34 (3.81) | 0.042344 |
|  | MAD+ PP+ (N = 15) | 10.52 (4.23) | 11.86 (4.76) | 0.310009 |
| Atrans (mm) | MAD+ MVP+ (N = 38) | 7.01 (3.48) | 5.39 (2.61) | 0.013873 |
|  | MAD+ AP- (N = 28) | 7.01 (3.48) | 5.27 (2.67) | 0.018667 |
|  | MAD+ PP- (N = 24) | 7.01 (3.48) | 5.74 (2.73) | 0.115507 |
|  | MAD+ PP+ (N = 15) | 7.01 (3.48) | 4.55 (2.40) | 0.004884 |
| Btrans (mm) | MAD+ MVP+ (N = 38) | 10.49 (3.95) | 9.64 (4.12) | 0.238816 |
|  | MAD+ AP- (N = 28) | 10.49 (3.95) | 9.23 (3.44) | 0.184527 |
|  | MAD+ PP- (N = 24) | 10.49 (3.95) | 9.85 (4.34) | 0.335749 |
|  | MAD+ PP+ (N = 15) | 10.49 (3.95) | 9.55 (3.41) | 0.484495 |
| P​long (mm) | MAD+ MVP+ (N = 38) | 19.50 (5.24) | 20.07 (6.21) | 0.506103 |
|  | MAD+ AP- (N = 28) | 19.50 (5.24) | 20.13 (6.21) | 0.565565 |
|  | MAD+ PP- (N = 24) | 19.50 (5.24) | 20.80 (6.80) | 0.233771 |
|  | MAD+ PP+ (N = 15) | 19.50 (5.24) | 18.27 (4.75) | 0.378067 |
| Along​ (mm) | MAD+ MVP+ (N = 38) | 14.37 (4.00) | 13.01 (4.29) | 0.023115 |
|  | MAD+ AP- (N = 28) | 14.37 (4.00) | 12.97 (3.78) | 0.080362 |
|  | MAD+ PP- (N = 24) | 14.37 (4.00) | 14.56 (4.99) | 0.606194 |
|  | MAD+ PP+ (N = 15) | 14.37 (4.00) | 11.28 (2.82) | 0.003455 |
| B long(mm) | MAD+ MVP+ (N = 38) | 20.30 (6.35) | 19.90 (7.11) | 0.523528 |
|  | MAD+ AP- (N = 28) | 20.30 (6.35) | 19.43 (8.21) | 0.259099 |
|  | MAD+ PP- (N = 24) | 20.30 (6.35) | 21.02 (7.19) | 0.901968 |
|  | MAD+ PP+ (N = 15) | 20.30 (6.35) | 17.14 (6.56) | 0.05868 |
| Pratio(mm) | MAD+ MVP+ (N = 38) | 0.56 (0.23) | 0.68 (0.29) | 0.031554 |
|  | MAD+ AP- (N = 28) | 0.56 (0.23) | 0.61 (0.29) | 0.52708 |
|  | MAD+ PP- (N = 24) | 0.56 (0.23) | 0.66 (0.31) | 0.187357 |
|  | MAD+ PP+ (N = 15) | 0.56 (0.23) | 0.67 (0.27) | 0.104566 |
| Aratio(mm) | MAD+ MVP+ (N = 38) | 0.50 (0.22) | 0.46 (0.32) | 0.100231 |
|  | MAD+ AP- (N = 28) | 0.50 (0.22) | 0.46 (0.33) | 0.080362 |
|  | MAD+ PP- (N = 24) | 0.50 (0.22) | 0.45 (0.27) | 0.255975 |
|  | MAD+ PP+ (N = 15) | 0.50 (0.22) | 0.47 (0.40) | 0.051012 |
| Bratio(mm) | MAD+ MVP+ (N = 38) | 0.58 (0.30) | 0.57 (0.39) | 0.550231 |
|  | MAD+ AP- (N = 28) | 0.58 (0.30) | 0.60 (0.43) | 0.664254 |
|  | MAD+ PP- (N = 24) | 0.58 (0.30) | 0.51 (0.24) | 0.52006 |
|  | MAD+ PP+ (N = 15) | 0.58 (0.30) | 0.70 (0.52) | 0.738117 |
