# Supplementary material
Source: Research Square preprint supplement (doi:10.21203/rs.3.rs-9924753/v1)
Supplement: Supplementary file 2 [file a3d3985969873e08a6a0f0f2.docx]

| Feature | Group | Control Mean (std) | Subgroup Mean (std) | p-value |
| --- | --- | --- | --- | --- |
| ζmin​​ (°) | AP+ (N = 13) | 76.81 (13.41) | 72.28 (12.08) | 0.28121 |
|  | AP- (N = 29) | 76.81 (13.41) | 67.96 (11.16) | 0.00108 |
|  | PP+ (N = 16) | 76.81 (13.41) | 67.78 (12.47) | 0.007245 |
|  | PP- (N = 26) | 76.81 (13.41) | 70.23 (10.98) | 0.026134 |
|  | MVP+ (N = 41) | 76.81 (13.41) | 69.09 (11.55) | 0.001636 |
|  | MVP- (N = 15) | 76.81 (13.41) | 76.66 (13.09) | 0.99515 |
|  | MAD+ (N = 68) | 76.81 (13.41) | 69.16 (12.27) | 0.000514 |
|  | MAD- (N = 9) | 76.81 (13.41) | 79.67 (13.77) | 0.677594 |
| ζES​−ζED​ (°) | AP+ (N = 13) | 42.85 (16.91) | 45.14 (14.59) | 0.766086 |
|  | AP- (N = 29) | 42.85 (16.91) | 41.79 (14.12) | 0.613499 |
|  | PP+ (N = 16) | 42.85 (16.91) | 42.59 (12.86) | 0.677862 |
|  | PP- (N = 26) | 42.85 (16.91) | 42.97 (15.17) | 0.975788 |
|  | MVP+ (N = 41) | 42.85 (16.91) | 43.91 (13.15) | 0.977 |
|  | MVP- (N = 15) | 42.85 (16.91) | 48.11 (17.06) | 0.226382 |
|  | MAD+ (N = 68) | 42.85 (16.91) | 45.99 (14.72) | 0.450645 |
|  | MAD- (N = 9) | 42.85 (16.91) | 42.83 (14.59) | 0.825792 |
| ζ´´min (°/ms²) | AP+ (N = 13) | -0.004 (0.002) | -0.0034 (0.002) | 0.386462 |
|  | AP- (N = 29) | -0.004 (0.002) | -0.005 (0.002) | 0.061368 |
|  | PP+ (N = 16) | -0.004 (0.002) | -0.004 (0.002) | 0.253937 |
|  | PP- (N = 26) | -0.004 (0.002) | -0.005 (0.002) | 0.558332 |
|  | MVP+ (N = 41) | -0.004 (0.002) | -0.005 (0.002) | 0.229566 |
|  | MVP- (N = 15) | -0.004 (0.002) | -0.004 (0.002) | 0.803174 |
|  | MAD+ (N = 68) | -0.004 (0.002) | -0.004 (0.002) | 0.184033 |
|  | MAD- (N = 9) | -0.004 (0.002) | -0.003 (0.002) | 0.401105 |
| ζ´min (°/ms) | AP+ (N = 13) | -0.33 (0.14) | -0.32 (0.13) | 1 |
|  | AP- (N = 29) | -0.33 (0.14) | -0.37 (0.18) | 0.256195 |
|  | PP+ (N = 16) | -0.33 (0.14) | -0.32 (0.08) | 0.967333 |
|  | PP- (N = 26) | -0.33 (0.14) | -0.38 (0.20) | 0.236552 |
|  | MVP+ (N = 41) | -0.33 (0.14) | -0.36 (0.16) | 0.266238 |
|  | MVP- (N = 15) | -0.33 (0.14) | -0.33 (0.13) | 0.631053 |
|  | MAD+ (N = 68) | -0.33 (0.14) | -0.37 (0.15) | 0.053151 |
|  | MAD- (N = 9) | -0.33 (0.14) | -0.29 (0.10) | 0.584943 |
| *dap*​ (mm) | AP+ (N = 13) | 5.92 (5.07) | 6.34 (3.40) | 0.817014 |
|  | AP- (N = 29) | 5.92 (5.07) | 7.64 (4.51) | 0.135959 |
|  | PP+ (N = 16) | 5.92 (5.07) | 7.96 (4.79) | 0.217037 |
|  | PP- (N = 26) | 5.92 (5.07) | 6.80 (3.82) | 0.402709 |
|  | MVP+ (N = 41) | 5.92 (5.07) | 7.33 (4.22) | 0.171286 |
|  | MVP- (N = 15) | 5.92 (5.07) | 7.61 (3.41) | 0.183086 |
|  | MAD+ (N = 68) | 5.92 (5.07) | 7.62 (3.94) | 0.037884 |
|  | MAD- (N = 9) | 5.92 (5.07) | 6.49 (4.53) | 0.787919 |
| *d’ap*​​ (mm/ms) | AP+ (N = 13) | 0.07 (0.03) | 0.07 (0.03) | 0.97363 |
|  | AP- (N = 29) | 0.07 (0.03) | 0.09 (0.05) | 0.041296 |
|  | PP+ (N = 16) | 0.07 (0.03) | 0.09 (0.05) | 0.263808 |
|  | PP- (N = 26) | 0.07 (0.03) | 0.08 (0.05) | 0.166637 |
|  | MVP+ (N = 41) | 0.07 (0.03) | 0.09 (0.05) | 0.071259 |
|  | MVP- (N = 15) | 0.07 (0.03) | 0.06 (0.03) | 0.454627 |
|  | MAD+ (N = 68) | 0.07 (0.03) | 0.08 (0.04) | 0.041301 |
|  | MAD- (N = 9) | 0.07 (0.03) | 0.07 (0.04) | 0.750542 |
| τP​ | AP+ (N = 13) | 1.85 (2.04) | 2.00 (1.20) | 0.123468 |
|  | AP- (N = 29) | 1.85 (2.04) | 1.61 (0.69) | 0.525829 |
|  | PP+ (N = 16) | 1.85 (2.04) | 1.64 (0.83) | 0.810432 |
|  | PP- (N = 26) | 1.85 (2.04) | 1.78 (0.92) | 0.130238 |
|  | MVP+ (N = 41) | 1.85 (2.04) | 1.75 (0.88) | 0.108455 |
|  | MVP- (N = 15) | 1.85 (2.04) | 1.40 (0.23) | 0.99515 |
|  | MAD+ (N = 68) | 1.85 (2.04) | 1.66 (0.76) | 0.240926 |
|  | MAD- (N = 9) | 1.85 (2.04) | 1.57 (0.28) | 0.163323 |
| τA​ | AP+ (N = 13) | 1.57 (1.03) | 1.27 (0.21) | 0.188307 |
|  | AP- (N = 29) | 1.57 (1.03) | 1.75 (1.29) | 0.547134 |
|  | PP+ (N = 16) | 1.57 (1.03) | 1.40 (0.64) | 0.172833 |
|  | PP- (N = 26) | 1.57 (1.03) | 1.73 (1.29) | 0.427524 |
|  | MVP+ (N = 41) | 1.57 (1.03) | 1.45 (0.54) | 0.588186 |
|  | MVP- (N = 15) | 1.57 (1.03) | 1.81 (1.64) | 0.523278 |
|  | MAD+ (N = 68) | 1.57 (1.03) | 1.54 (0.87) | 0.648272 |
|  | MAD- (N = 9) | 1.57 (1.03) | 1.90 (1.90) | 0.838511 |
| τB​ | AP+ (N = 13) | 2.01 (1.18) | 1.76 (0.61) | 0.952554 |
|  | AP- (N = 29) | 2.01 (1.18) | 1.57 (0.55) | 0.170753 |
|  | PP+ (N = 16) | 2.01 (1.18) | 1.63 (0.66) | 0.279104 |
|  | PP- (N = 26) | 2.01 (1.18) | 1.63 (0.52) | 0.47974 |
|  | MVP+ (N = 41) | 2.01 (1.18) | 1.63 (0.58) | 0.250055 |
|  | MVP- (N = 15) | 2.01 (1.18) | 1.55 (0.56) | 0.179119 |
|  | MAD+ (N = 68) | 2.01 (1.18) | 1.64 (0.58) | 0.172554 |
|  | MAD- (N = 9) | 2.01 (1.18) | 1.49 (0.30) | 0.401105 |
| Ptrans(mm) | AP+ (N = 13) | 10.52 (4.23) | 13.05 (3.07) | 0.018929 |
|  | AP- (N = 29) | 10.52 (4.23) | 11.41 (4.43) | 0.371863 |
|  | PP+ (N = 16) | 10.52 (4.23) | 11.71 (4.63) | 0.346232 |
|  | PP- (N = 26) | 10.52 (4.23) | 12.04 (3.81) | 0.071968 |
|  | MVP+ (N = 41) | 10.52 (4.23) | 12.25 (4.02) | 0.025965 |
|  | MVP- (N = 15) | 10.52 (4.23) | 8.73 (3.48) | 0.20826 |
|  | MAD+ (N = 68) | 10.52 (4.23) | 11.88 (4.23) | 0.041745 |
|  | MAD- (N = 9) | 10.52 (4.23) | 9.94 (2.45) | 0.876911 |
| Atrans (mm) | AP+ (N = 13) | 7.01 (3.48) | 4.83 (2.73) | 0.01582 |
|  | AP- (N = 29) | 7.01 (3.48) | 5.30 (2.63) | 0.021497 |
|  | PP+ (N = 16) | 7.01 (3.48) | 4.66 (2.36) | 0.006754 |
|  | PP- (N = 26) | 7.01 (3.48) | 5.46 (2.79) | 0.04114 |
|  | MVP+ (N = 41) | 7.01 (3.48) | 5.25 (2.62) | 0.006156 |
|  | MVP- (N = 15) | 7.01 (3.48) | 4.97 (1.84) | 0.085365 |
|  | MAD+ (N = 68) | 7.01 (3.48) | 5.44 (2.55) | 0.008478 |
|  | MAD- (N = 9) | 7.01 (3.48) | 5.41 (4.09) | 0.131527 |
| Btrans(mm) | AP+ (N = 13) | 10.49 (3.95) | 10.48 (5.10) | 0.756013 |
|  | AP- (N = 29) | 10.49 (3.95) | 9.41 (3.51) | 0.259595 |
|  | PP+ (N = 16) | 10.49 (3.95) | 9.85 (3.51) | 0.669319 |
|  | PP- (N = 26) | 10.49 (3.95) | 9.68 (4.39) | 0.27267 |
|  | MVP+ (N = 41) | 10.49 (3.95) | 9.65 (4.17) | 0.263492 |
|  | MVP- (N = 15) | 10.49 (3.95) | 9.01 (2.36) | 0.199604 |
|  | MAD+ (N = 68) | 10.49 (3.95) | 9.77 (3.59) | 0.284477 |
|  | MAD- (N = 9) | 10.49 (3.95) | 7.90 (3.63) | 0.071612 |
| Plong​ (mm)​ | AP+ (N = 13) | 19.50 (5.24) | 18.69 (5.77) | 0.521345 |
|  | AP- (N = 29) | 19.50 (5.24) | 20.13 (6.10) | 0.531115 |
|  | PP+ (N = 16) | 19.50 (5.24) | 18.38 (4.61) | 0.450424 |
|  | PP- (N = 26) | 19.50 (5.24) | 20.48 (6.62) | 0.417493 |
|  | MVP+ (N = 41) | 19.50 (5.24) | 19.90 (6.02) | 0.656068 |
|  | MVP- (N = 15) | 19.50 (5.24) | 15.71 (4.62) | 0.022629 |
|  | MAD+ (N = 68) | 19.50 (5.24) | 19.02 (6.01) | 0.629191 |
|  | MAD- (N = 9) | 19.50 (5.24) | 18.46 (5.16) | 0.458193 |
| A​long(mm) | AP+ (N = 13) | 14.37 (4.00) | 13.63 (5.81) | 0.084439 |
|  | AP- (N = 29) | 14.37 (4.00) | 13.00 (3.71) | 0.084461 |
|  | PP+ (N = 16) | 14.37 (4.00) | 11.44 (2.80) | 0.004547 |
|  | PP- (N = 26) | 14.37 (4.00) | 14.28 (4.89) | 0.378778 |
|  | MVP+ (N = 41) | 14.37 (4.00) | 12.93 (4.15) | 0.013994 |
|  | MVP- (N = 15) | 14.37 (4.00) | 12.68 (4.06) | 0.051012 |
|  | MAD+ (N = 68) | 14.37 (4.00) | 12.56 (3.88) | 0.000824 |
|  | MAD- (N = 9) | 14.37 (4.00) | 13.16 (4.97) | 0.076899 |
| Blong ​ (mm) | AP+ (N = 13) | 20.30 (6.35) | 19.21 (3.35) | 0.610715 |
|  | AP- (N = 29) | 20.30 (6.35) | 19.16 (8.19) | 0.186401 |
|  | PP+ (N = 16) | 20.30 (6.35) | 16.79 (6.48) | 0.032727 |
|  | PP- (N = 26) | 20.30 (6.35) | 20.64 (7.03) | 0.865724 |
|  | MVP+ (N = 41) | 20.30 (6.35) | 19.51 (7.01) | 0.319043 |
|  | MVP- (N = 15) | 20.30 (6.35) | 17.13 (4.45) | 0.087597 |
|  | MAD+ (N = 68) | 20.30 (6.35) | 19.68 (6.54) | 0.4587 |
|  | MAD- (N = 9) | 20.30 (6.35) | 18.25 (4.55) | 0.348516 |
| P​ ratio | AP+ (N = 13) | 0.56 (0.23) | 0.75 (0.27) | 0.008675 |
|  | AP- (N = 29) | 0.56 (0.23) | 0.61 (0.28) | 0.563388 |
|  | PP+ (N = 16) | 0.56 (0.23) | 0.66 (0.27) | 0.132693 |
|  | PP- (N = 26) | 0.56 (0.23) | 0.65 (0.30) | 0.21982 |
|  | MVP+ (N = 41) | 0.56 (0.23) | 0.67 (0.28) | 0.04663 |
|  | MVP- (N = 15) | 0.56 (0.23) | 0.58 (0.20) | 0.418795 |
|  | MAD+ (N = 68) | 0.56 (0.23) | 0.66 (0.26) | 0.010978 |
|  | MAD- (N = 9) | 0.56 (0.23) | 0.56 (0.15) | 0.813118 |
| Aratio | AP+ (N = 13) | 0.50 (0.22) | 0.40 (0.30) | 0.073197 |
|  | AP- (N = 29) | 0.50 (0.22) | 0.46 (0.33) | 0.084461 |
|  | PP+ (N = 16) | 0.50 (0.22) | 0.47 (0.39) | 0.05725 |
|  | PP- (N = 26) | 0.50 (0.22) | 0.43 (0.27) | 0.105831 |
|  | MVP+ (N = 41) | 0.50 (0.22) | 0.45 (0.31) | 0.04879 |
|  | MVP- (N = 15) | 0.50 (0.22) | 0.42 (0.18) | 0.432924 |
|  | MAD+ (N = 68) | 0.50 (0.22) | 0.47 (0.28) | 0.276543 |
|  | MAD- (N = 9) | 0.50 (0.22) | 0.38 (0.19) | 0.131527 |
| Bratio | AP+ (N = 13) | 0.58 (0.30) | 0.54 (0.24) | 0.910516 |
|  | AP- (N = 29) | 0.58 (0.30) | 0.62 (0.44) | 0.868418 |
|  | PP+ (N = 16) | 0.58 (0.30) | 0.74 (0.52) | 0.486301 |
|  | PP- (N = 26) | 0.58 (0.30) | 0.51 (0.24) | 0.437694 |
|  | MVP+ (N = 41) | 0.58 (0.30) | 0.58 (0.39) | 0.628531 |
|  | MVP- (N = 15) | 0.58 (0.30) | 0.57 (0.24) | 0.666023 |
|  | MAD+ (N = 68) | 0.58 (0.30) | 0.57 (0.33) | 0.784316 |
|  | MAD- (N = 9) | 0.58 (0.30) | 0.48 (0.33) | 0.230787 |
